# Supplementary material for: Formation and the structure of freeze-dried MgO nanoparticle foams and their electrical behaviour in polyethylene
Source: Royal Society of Chemistry journal article supplement (doi:10.1039/c4ta06362g), 2015-01-01

## Supplementary Information

### Freeze-dried MgO nanoparticle foams and their electrical performance in polyethylene

*Love K. H. Pallon<sup>a</sup>, Richard T. Olsson<sup>a, \*</sup>, Dongming Liu<sup>a</sup>, Amir M. Pourrahipi<sup>a</sup>,  
Mikael S. Hedenqvist<sup>a</sup>, Anh T. Hoang<sup>b</sup>, Stanislaw Gubanski<sup>b</sup>, Ulf W. Gedde<sup>a</sup>*

<sup>a</sup> KTH Royal Institute of Technology, School of Chemical Science and Engineering,  
Fiber and Polymer Technology, SE-100 44 Stockholm, Sweden

<sup>b</sup> Chalmers University of Technology, Department of Materials and Manufacturing  
Technology, High Voltage Engineering, SE-412 96 Göteborg, Sweden

\*Corresponding author: Richard T. Olsson,

*E-mail:* [rols@kth.se](mailto:rols@kth.se)

**S1-** Freeze dried  $\text{Mg}(\text{OH})_2$  from  $\text{MgSO}_4$  and  $\text{NaOH}$

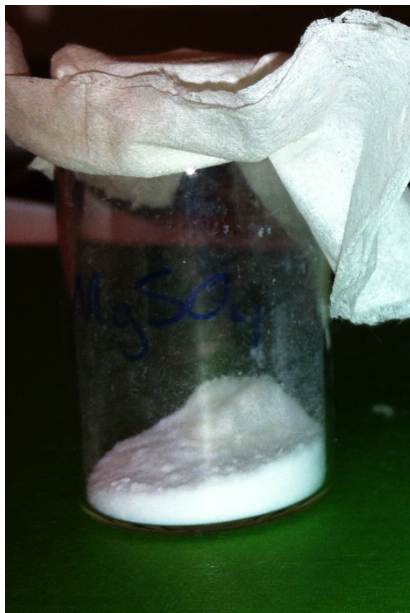

## S2 – Nitrogen adsorption data

### Mg(OH)<sub>2</sub> FD

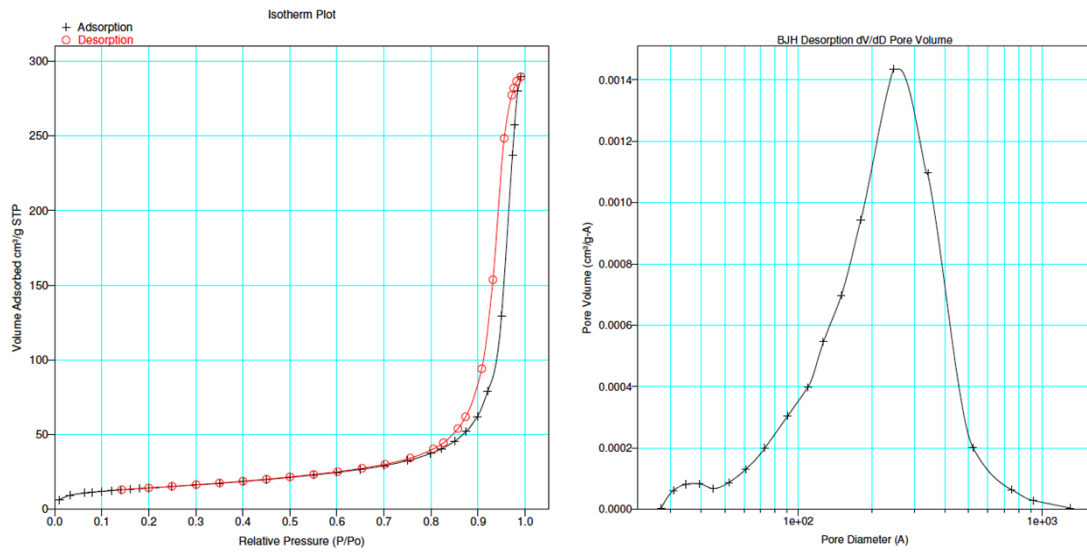

### Mg(OH)<sub>2</sub> CD

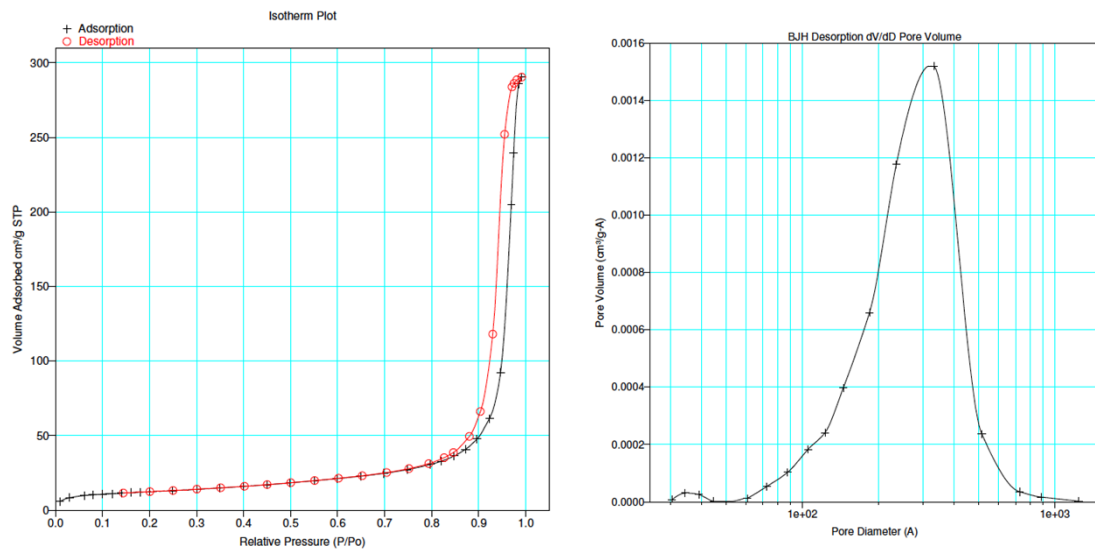

## MgO FD

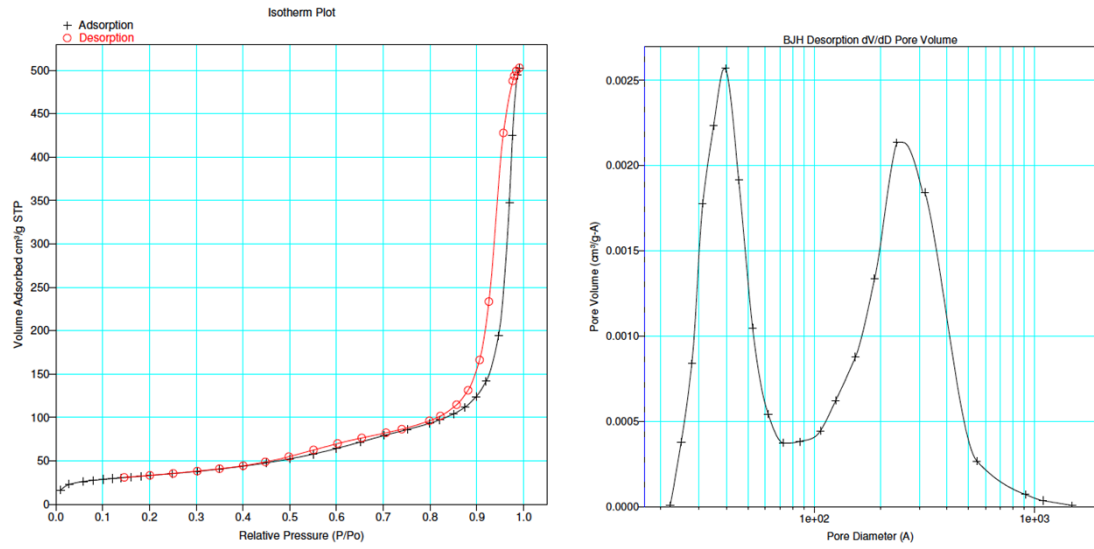

## MgO CD

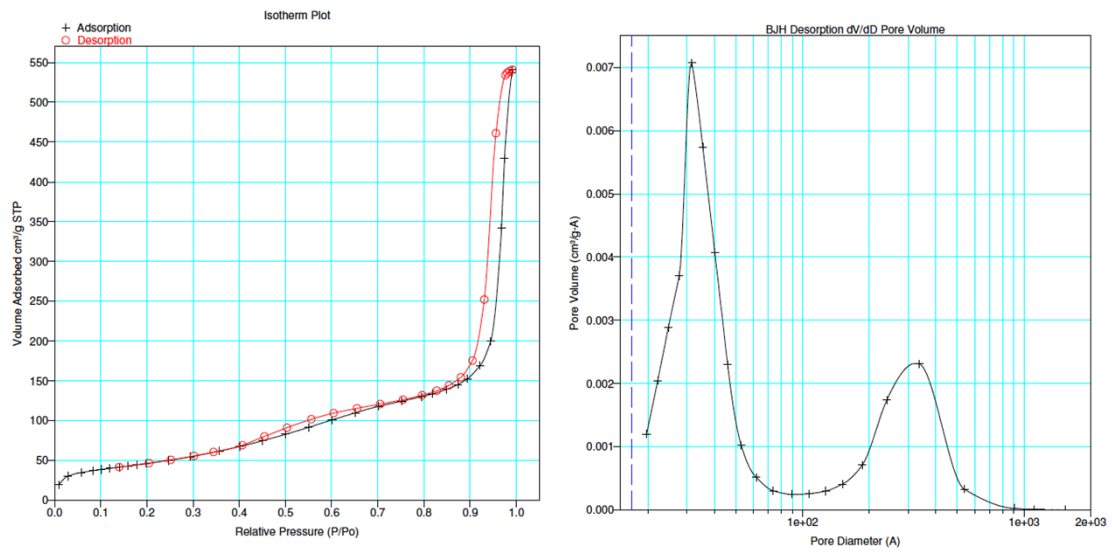

**S3 – Statistical evaluation of MgO-aggregates on Si-wafer when deposit after  
dispersion with ultrasonic bath in 2-propanol.**

Table S3. Mass-percent of nanoparticle material present as aggregates after ultrasonication

| Sample <sup>a</sup> | Ultrasonication time<br>(min) | Number of<br>aggregates <sup>b</sup> | Percent aggregated material <sup>c</sup><br>[wt.%] |
|---------------------|-------------------------------|--------------------------------------|----------------------------------------------------|
| FD-30               | 30                            | 1435                                 | 87                                                 |
| FD-60               | 60                            | 721                                  | 64                                                 |
| FD-120              | 120                           | 879                                  | 50                                                 |
| CD-30               | 30                            | 352                                  | 21                                                 |
| CD-60               | 60                            | 154                                  | 10                                                 |
| CD-120              | 120                           | 191                                  | 10                                                 |

a) Three sample of each freeze-dried (FD) and conventional dried (CD), where the number is the time of ultrasonication. b) The number of aggregates is normalized with respect to the size of the Si-wafer. c) Based on micrographs the aggregates density is assumed to be  $1790 \text{ kg m}^{-3}$ , which is half the density of bulk MgO.

**S4** – Micrographs of LDPE/MgO extruded at 115 °C for 6 min.

MgO FD – At 115 °C, the MgO tends to release fewer solitary particles with more remaining aggregates.

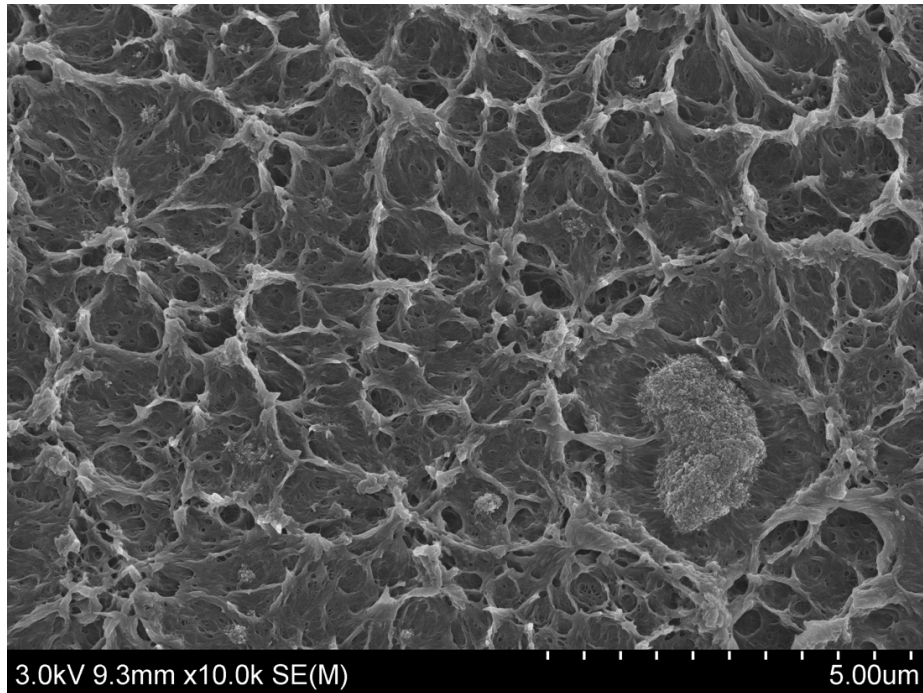

MgO CD – Micrograph of LDPE/CD extruded at 115 °C and 6 minutes.

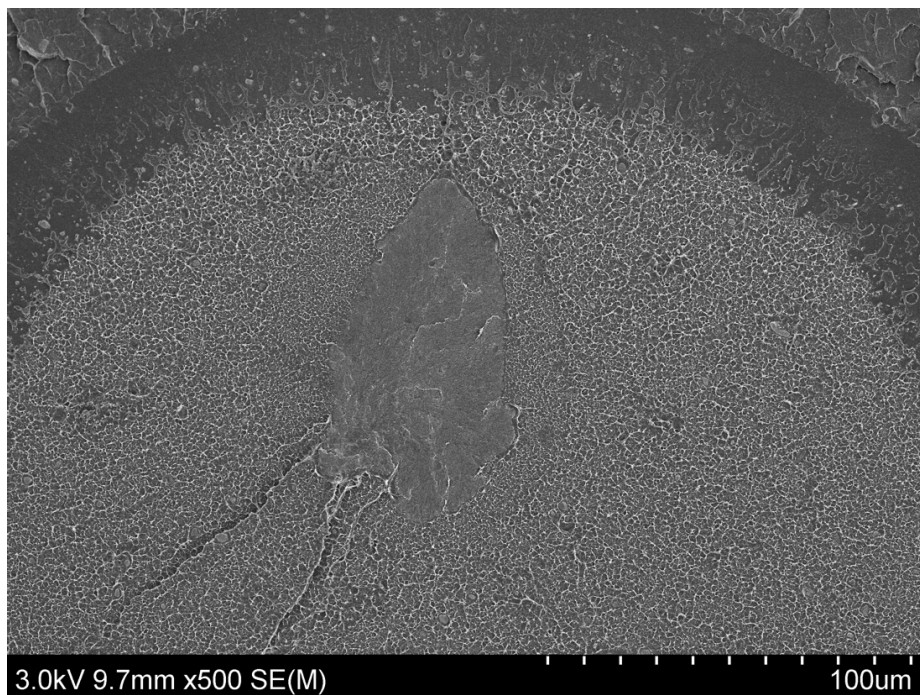

Supplement: c4ta06362g1.pdf [file c4ta06362g1.pdf]
